# Supplementary material
Source: Springer Nature journal article supplement (https://www.springermedizin.de/resource/supplementary/12911_2007_198_MOESM1_ESM.pdf/9527364)
Supplement: MOESM1 [file 9527364]

## List of journals included in the manual search

| Journal name                                                            | Website                                             | PubMed                     | PMC                         |
|-------------------------------------------------------------------------|-----------------------------------------------------|----------------------------|-----------------------------|
| AMIA Annual Symposium Proceedings                                       | <a href="#">Website</a>                             | <a href="#">References</a> | <a href="#">Open Access</a> |
| Annual Review of Information Science and Technology                     | <a href="#">Website</a>                             | no                         | no                          |
| Artificial Intelligence in Medicine                                     | <a href="#">Website</a>                             | <a href="#">References</a> | no                          |
| BMC Medical Informatics and Decision Making                             | <a href="#">Website</a> <a href="#">Open Access</a> | <a href="#">References</a> | <a href="#">Open Access</a> |
| CIN: Computers, Informatics, Nursing                                    | <a href="#">Website</a>                             | <a href="#">References</a> | no                          |
| Computer Methods and Programs in Biomedicine                            | <a href="#">Website</a>                             | <a href="#">References</a> | no                          |
| Computers in Biology and Medicine                                       | <a href="#">Website</a>                             | <a href="#">References</a> | no                          |
| Disease Management and Health Outcomes                                  | <a href="#">Website</a>                             | no                         | no                          |
| Electronic Journal of Health Informatics                                | <a href="#">Website</a> <a href="#">Open Access</a> | no                         | no                          |
| Health Informatics Journal                                              | <a href="#">Website</a>                             | <a href="#">References</a> | no                          |
| Health Information and Libraries Journal                                | <a href="#">Website</a>                             | <a href="#">References</a> | no                          |
| IEEE Computer                                                           | <a href="#">Website</a>                             | no                         | no                          |
| IEEE Engineering in Medicine and Biology Magazine                       | <a href="#">Website</a>                             | <a href="#">References</a> | no                          |
| IEEE Pervasive Computing                                                | <a href="#">Website</a>                             | no                         | no                          |
| IEEE Transactions on Information Technology in Biomedicine              | <a href="#">Website</a>                             | <a href="#">References</a> | no                          |
| Informatics in Primary Care                                             | <a href="#">Website</a>                             | <a href="#">References</a> | no                          |
| Informatics Review (The)                                                | <a href="#">Website</a>                             | no                         | no                          |
| International Journal of Ad Hoc and Ubiquitous Computing                | <a href="#">Website</a>                             | no                         | no                          |
| International Journal of Electronic Healthcare                          | <a href="#">Website</a>                             | no                         | no                          |
| International Journal of Healthcare Information Systems and Informatics | <a href="#">Website</a>                             | no                         | no                          |
| International Journal of Healthcare Technology and Management           | <a href="#">Website</a>                             | no                         | no                          |
| International Journal of Medical Informatics                            | <a href="#">Website</a>                             | <a href="#">References</a> | no                          |
| International Journal of Technology Assessment in Health Care           | <a href="#">Website</a>                             | <a href="#">References</a> | no                          |
| Journal of American Medical Informatics Association (The)               | <a href="#">Website</a>                             | <a href="#">References</a> | <a href="#">Open Access</a> |
| Journal of Biomedical Informatics                                       | <a href="#">Website</a>                             | <a href="#">References</a> | no                          |
| Journal of Evaluation of Clinical Practice                              | <a href="#">Website</a>                             | <a href="#">References</a> | no                          |
| Journal of Healthcare Information Management                            | <a href="#">Website</a>                             | <a href="#">References</a> | no                          |
| Journal of Information Technology in Healthcare                         | <a href="#">Website</a>                             | no                         | no                          |
| Journal of Medical Engineering and Technology                           | <a href="#">Website</a>                             | <a href="#">References</a> | no                          |
| Journal of Medical Internet Research                                    | <a href="#">Website</a> <a href="#">Open Access</a> | <a href="#">References</a> | <a href="#">Open Access</a> |
| Journal of Medical Systems                                              | <a href="#">Website</a>                             | <a href="#">References</a> | no                          |
| Journal of Telemedicine and Telecare                                    | <a href="#">Website</a>                             | <a href="#">References</a> | no                          |
| Journal of Universal Computer Science                                   | <a href="#">Website</a> <a href="#">Open Access</a> | no                         | no                          |
| Medical and Biological Engineering and Computing                        | <a href="#">Website</a>                             | <a href="#">References</a> | no                          |
| Medical Decision Making                                                 | <a href="#">Website</a>                             | <a href="#">References</a> | no                          |
| Medical Engineering and Physics                                         | <a href="#">Website</a>                             | <a href="#">References</a> | no                          |
| Medical Informatics and the Internet in Medicine                        | <a href="#">Website</a>                             | <a href="#">References</a> | no                          |
| Methods of Information in Medicine                                      | <a href="#">Website</a>                             | <a href="#">References</a> | no                          |
| Personal and Ubiquitous Computing                                       | <a href="#">Website</a>                             | no                         | no                          |
| Pervasive and Mobile Computing                                          | <a href="#">Website</a>                             | no                         | no                          |
| Studies in Health Technology and Informatics                            | <a href="#">Website</a>                             | <a href="#">References</a> | no                          |
| Technology and Health Care                                              | <a href="#">Website</a>                             | <a href="#">References</a> | no                          |
| Telematics and Informatics                                              | <a href="#">Website</a>                             | no                         | no                          |
| Telemedicine Journal and e-Health                                       | <a href="#">Website</a>                             | <a href="#">References</a> | no                          |
| Ubiquitous Computing and Communication Journal                          | <a href="#">Website</a> <a href="#">Open Access</a> | no                         | no                          |
| Ubiquity                                                                | <a href="#">Website</a>                             | no                         | no                          |

As of November 2007. Related to article "Towards Pervasive Computing in Health Care - A Literature Review", by Carsten Orwat, Andreas Graefe, Timm Faulwasser
